# Supplementary material for: Tunable pseudocapacitance storage of MXene by cation pillaring for high performance sodium-ion capacitors
Source: Royal Society of Chemistry journal article supplement (doi:10.1039/c8ta02068j), 2018-01-01
Supplement: c8ta02068j1.pdf [file c8ta02068j1.pdf]

# Tunable Pseudocapacitance Storage of MXene by Cation Pillaring for High-Performance Sodium Ion Capacitors

Jianmin Luo,<sup>a,b</sup> Cong Fang,<sup>a</sup> Chengbin Jin,<sup>a</sup> Huadong Yuan,<sup>a</sup> Ouwei Sheng,<sup>a</sup> Ruyi Fang,<sup>a</sup>  
Wenkui Zhang,<sup>a</sup> Hui Huang,<sup>a</sup> Yongping Gan,<sup>a</sup> Yang Xia,<sup>a</sup> Chu Liang,<sup>a</sup> Jun Zhang,<sup>a</sup> Weiyang  
Li,<sup>b,\*</sup> and Xinyong Tao<sup>a,\*</sup>

<sup>a</sup> College of Materials Science and Engineering, Zhejiang University of Technology, Hangzhou 310014, People's Republic of China; <sup>b</sup> Thayer School of Engineering, Dartmouth College, Hanover, New Hampshire 03755, United States

\*Address correspondence to, Weiyang.Li@dartmouth.edu (W. Li), tao@zjut.edu.cn (X. Tao)

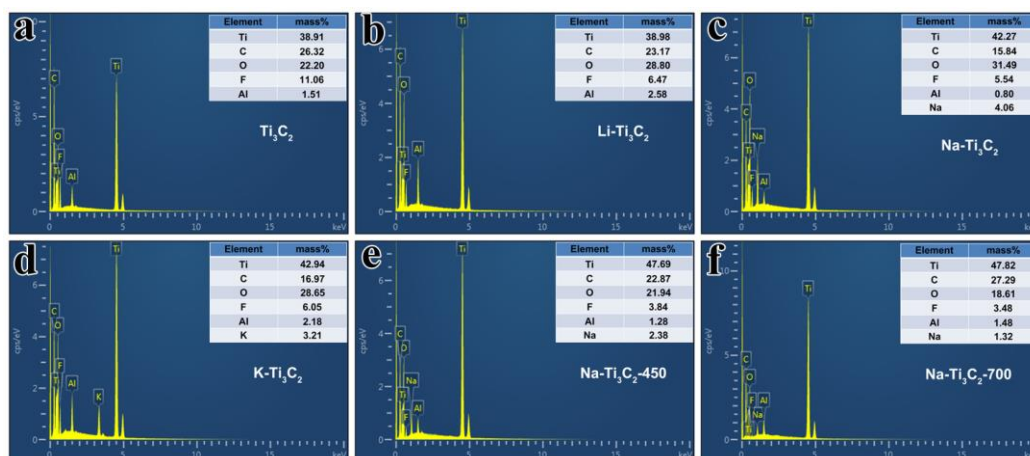

Fig. S1 Energy dispersive spectroscopy of (a) Ti<sub>3</sub>C<sub>2</sub>, (b) Li-Ti<sub>3</sub>C<sub>2</sub>, (c) Na-Ti<sub>3</sub>C<sub>2</sub>, (d) K-Ti<sub>3</sub>C<sub>2</sub>, (e) Na-Ti<sub>3</sub>C<sub>2</sub>-450, (f) Na-Ti<sub>3</sub>C<sub>2</sub>-700.

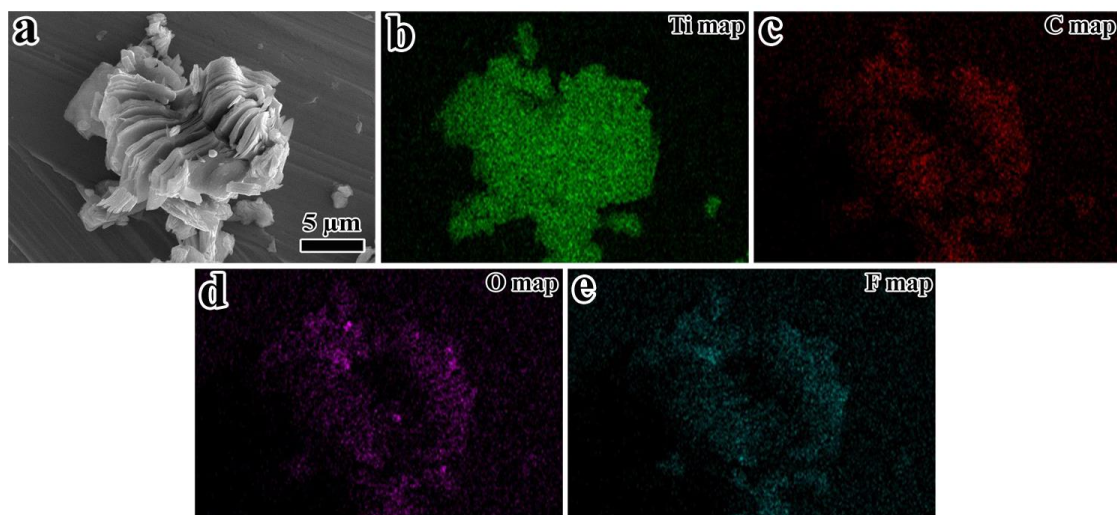

**Fig. S2a (a-e)** SEM image of  $\text{Ti}_3\text{C}_2$  and elemental mapping of Ti, C, O and F, which confirm the homogeneously distribution of  $-\text{OH}$  and  $-\text{F}$  groups in all MXene sheets.

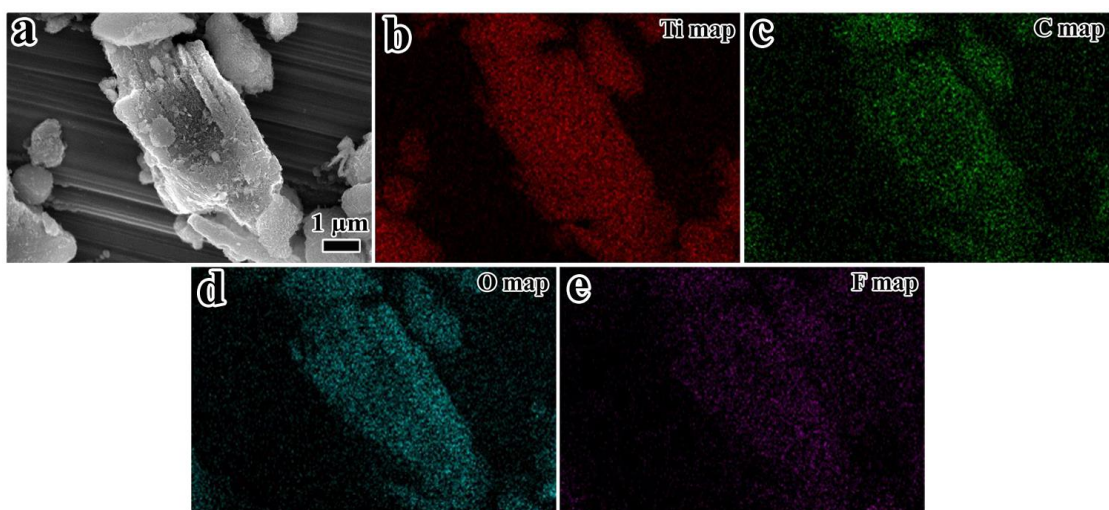

**Fig. S2b (a-e)** SEM image of  $\text{Li-Ti}_3\text{C}_2$  and elemental mapping of Ti, C, O and F. After  $\text{Li}^+$  pillaring, the  $-\text{F}$  groups was replaced by  $-\text{OH}$  due to the decrease intensity of the F signal and the increase intensity of the O signal compared with those in  $\text{Ti}_3\text{C}_2$ , while the signal of Li can't be detected by EDS.

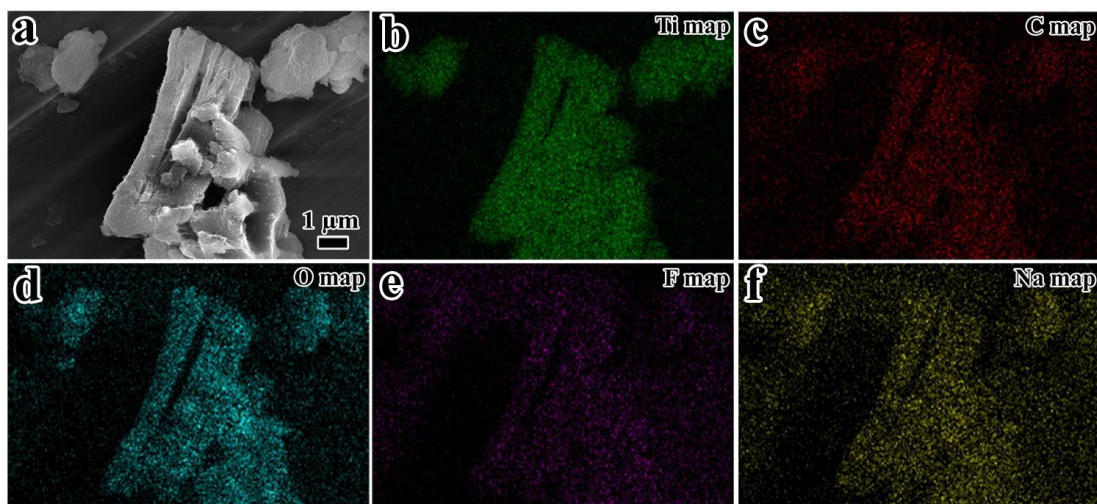

**Fig. S2c (a-f) SEM image of Na-Ti<sub>3</sub>C<sub>2</sub> and elemental mapping of Ti, C, O, F, and Na, which confirm the homogeneous distribution of Na in all MXene sheets. After Na<sup>+</sup> pillaring, the –F groups was replaced by –OH due to the decrease intensity of the F signal and the increase intensity of the O signal compared with those in Ti<sub>3</sub>C<sub>2</sub>.**

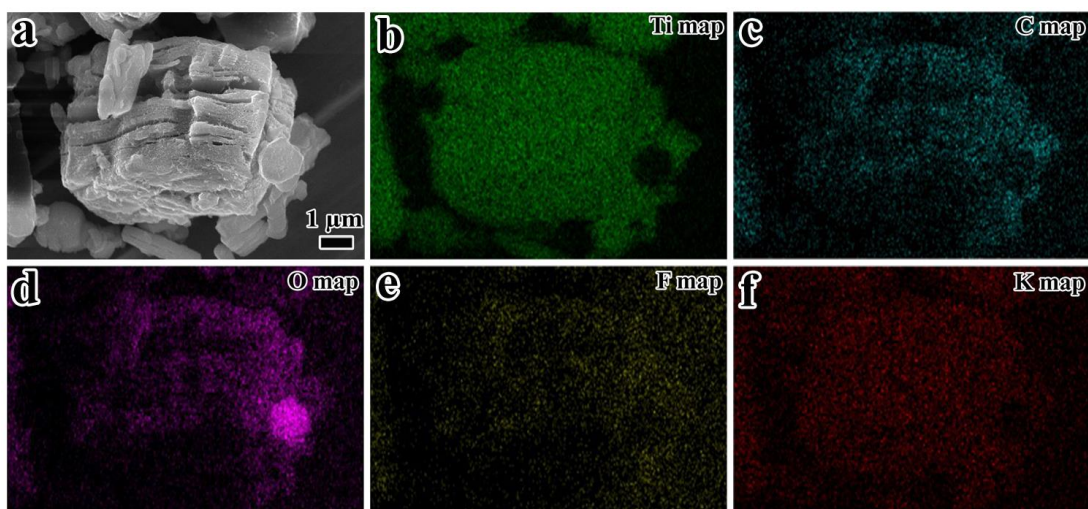

**Fig. S2d (a-f) SEM image of K-Ti<sub>3</sub>C<sub>2</sub> and elemental mapping of Ti, C, O, F, and K, which confirms the homogeneous distribution of K in all MXene sheets. After K<sup>+</sup> pillaring, the –F groups was replaced by –OH due to the decrease intensity of the F signal and the increase intensity of the O signal compared with those in Ti<sub>3</sub>C<sub>2</sub>.**



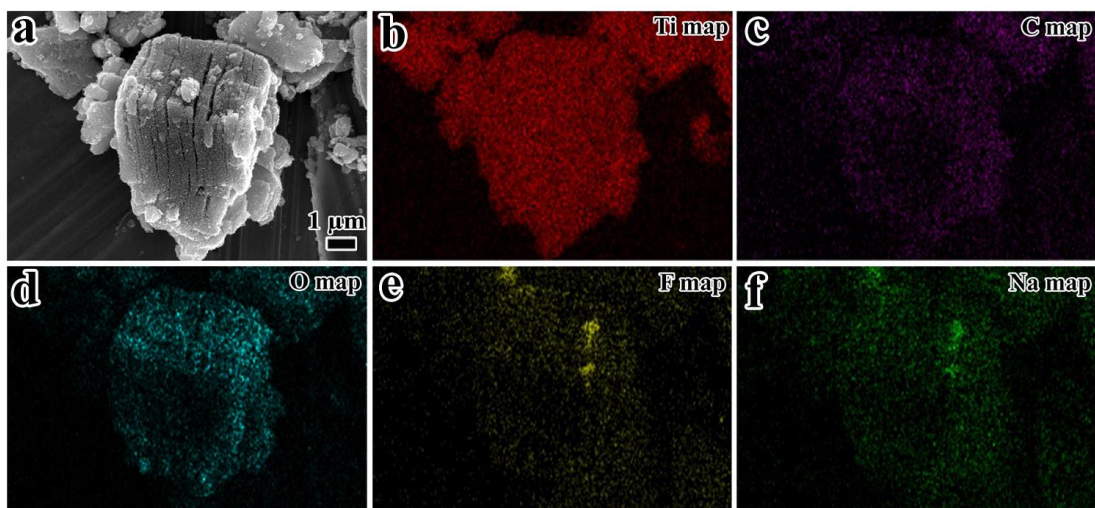

**Fig. S2e (a-f) SEM image of Na-Ti<sub>3</sub>C<sub>2</sub>-450 and elemental mapping of Ti, C, O, F, and Na, which confirms the homogeneous distribution of Na in all MXene sheets after calcinations at 450 °C. The O signal decreased compared with Na-Ti<sub>3</sub>C<sub>2</sub>.**

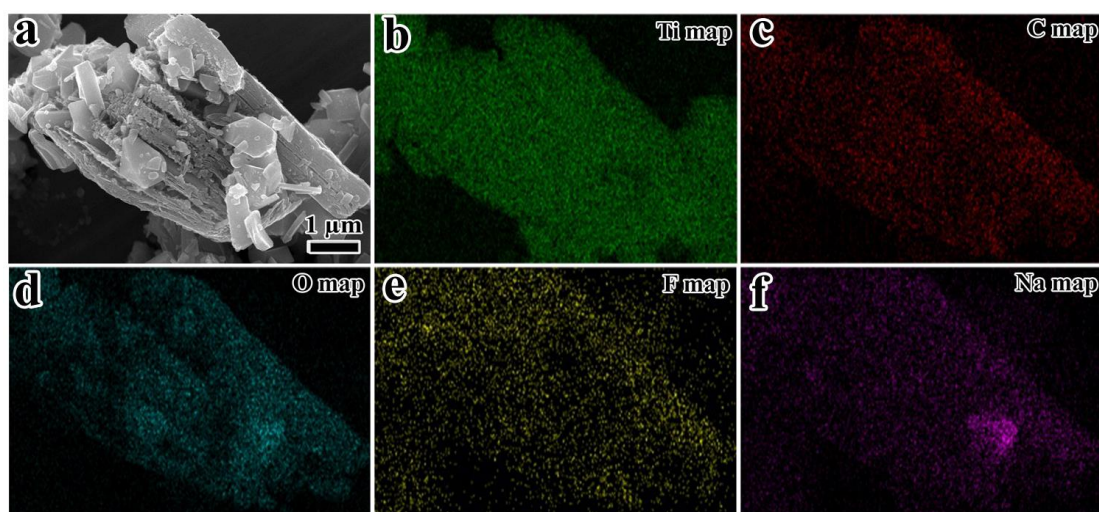

**Fig. S2f (a-f) SEM image of Na-Ti<sub>3</sub>C<sub>2</sub>-700 and elemental mapping of Ti, C, O, F, and Na, which confirms the homogeneous distribution further of Na in all MXene sheets after calcinations at 700 °C. The O signal decreased further compared with Na-Ti<sub>3</sub>C<sub>2</sub>-450.**

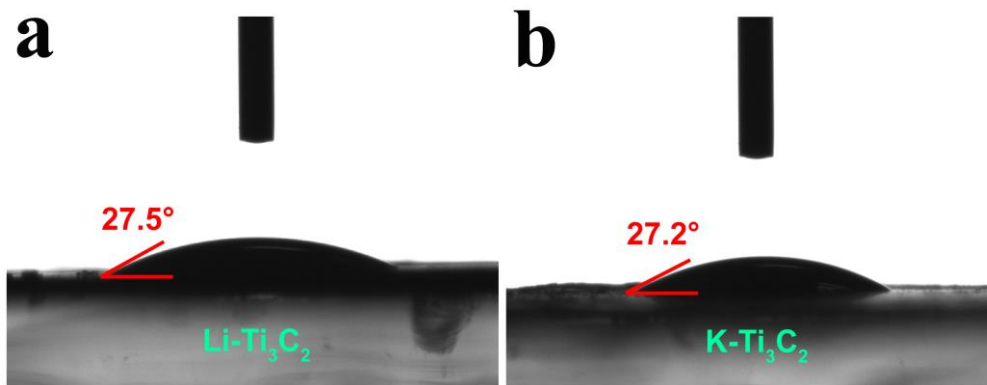

Fig. S3 (a, b) Surface wetting of the water droplet on the Li-Ti<sub>3</sub>C<sub>2</sub>, K-Ti<sub>3</sub>C<sub>2</sub>.

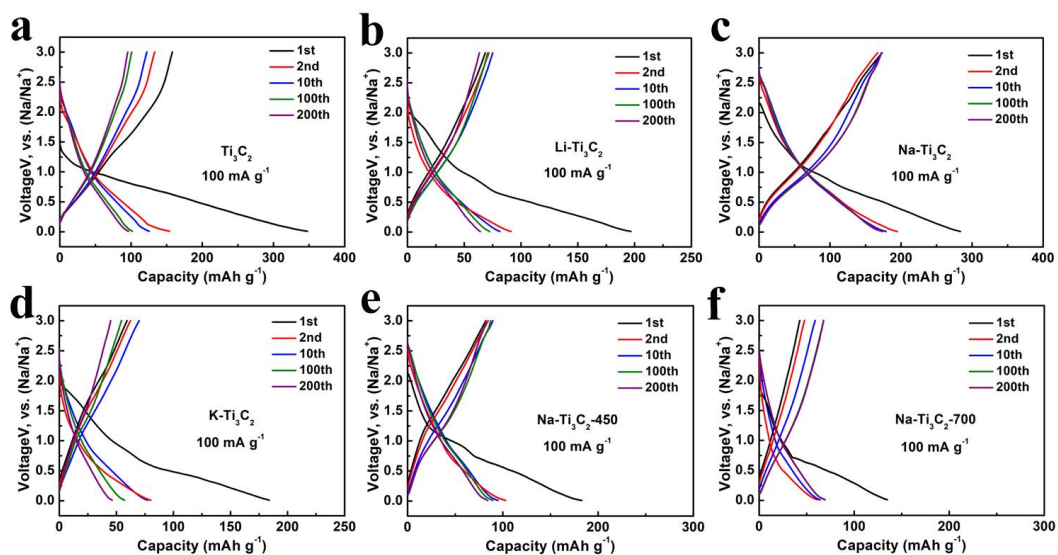

Fig. S4 The galvanostatic charge/discharge profiles of (a) Ti<sub>3</sub>C<sub>2</sub>, (b) Li-Ti<sub>3</sub>C<sub>2</sub>, (c) Na-Ti<sub>3</sub>C<sub>2</sub>, (d) K-Ti<sub>3</sub>C<sub>2</sub>, (e) Na-Ti<sub>3</sub>C<sub>2</sub>-450, and (f) Na-Ti<sub>3</sub>C<sub>2</sub>-700 at a current density of 0.1 A g<sup>-1</sup>.

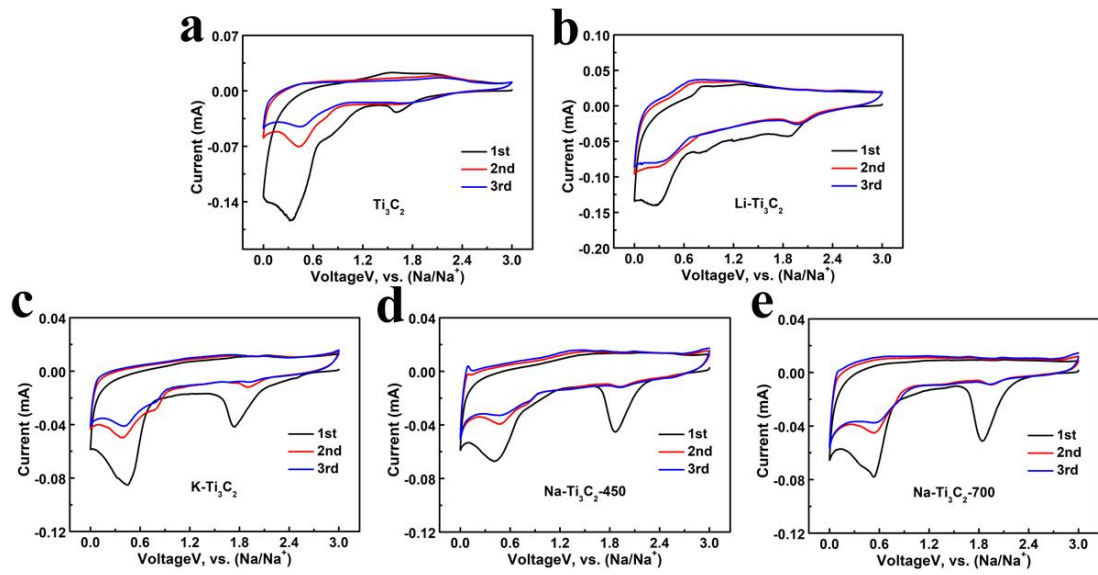

Fig. S5 CV curves of (a)  $\text{Ti}_3\text{C}_2$ , (b)  $\text{Li-Ti}_3\text{C}_2$ , (c)  $\text{K-Ti}_3\text{C}_2$ , (d)  $\text{Na-Ti}_3\text{C}_2$ -450, and (e)  $\text{Na-Ti}_3\text{C}_2$ -700 at  $0.1 \text{ mV s}^{-1}$ .

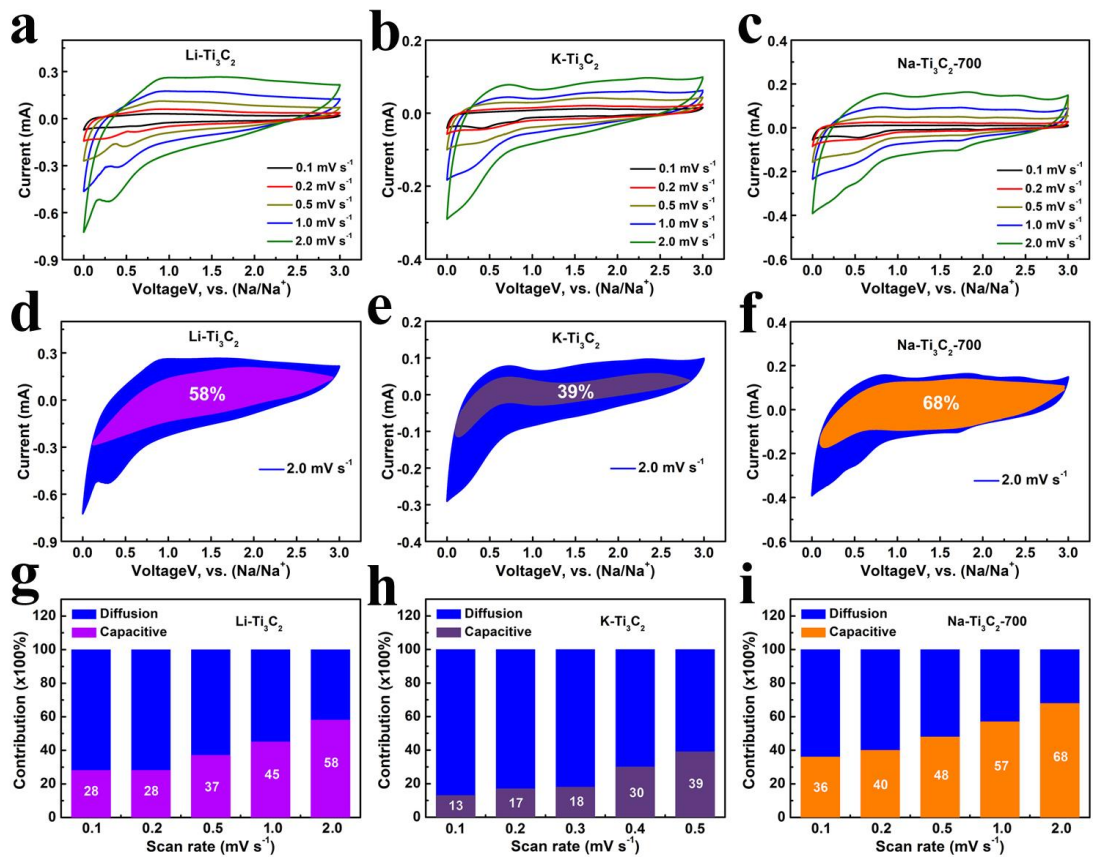

Fig. S6 (a-c) CV curves of  $\text{Li-Ti}_3\text{C}_2$ ,  $\text{K-Ti}_3\text{C}_2$ , and  $\text{Na-Ti}_3\text{C}_2$ -700 electrodes at different scan rates. (d-f) Capacitive and diffusion currents (blue) contributed to charge storage of  $\text{Li-Ti}_3\text{C}_2$ ,  $\text{K-Ti}_3\text{C}_2$ , and  $\text{Na-Ti}_3\text{C}_2$ -700 at a scan rate of  $2.0 \text{ mV s}^{-1}$ . (g-i) The percentage of capacitance contribution of  $\text{Li-Ti}_3\text{C}_2$ ,  $\text{K-Ti}_3\text{C}_2$ , and  $\text{Na-Ti}_3\text{C}_2$ -700 at different scan rates ( $0.1$ - $2.0 \text{ mV s}^{-1}$ ).

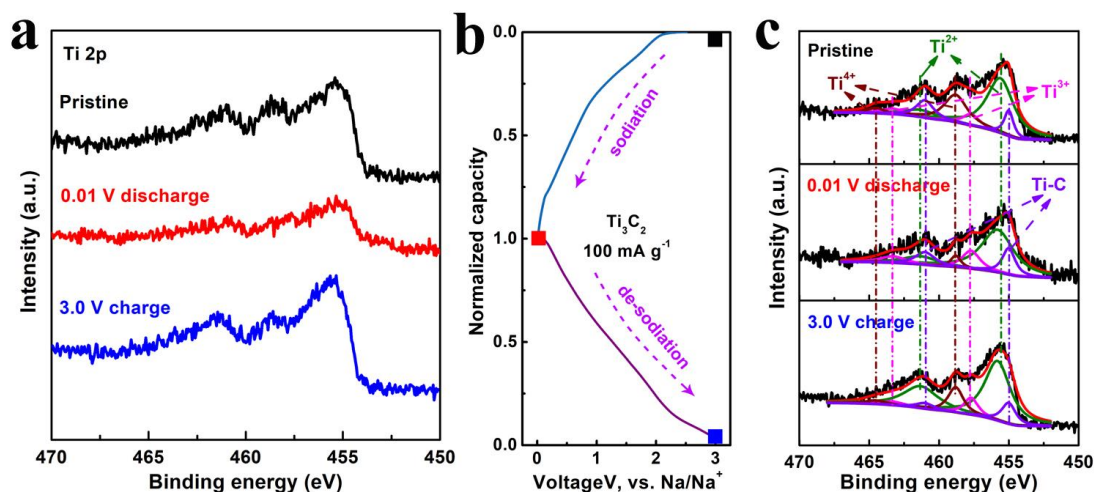

Fig. S7 Ex situ XPS studies for the  $\text{Ti}_3\text{C}_2$ . (a) The ex situ XPS spectra of the Ti 2p peaks to survey the changes in valence states of Ti during the sodiation and de-sodiation processes about  $\text{Ti}_3\text{C}_2$ . (b) Voltage profiles of  $\text{Ti}_3\text{C}_2$  in different states of sodiation/desodiation at which the samples were taken for ex situ XPS test. (c) The Ti 2p peaks of  $\text{Ti}_3\text{C}_2$  samples at pristine state, 0.01 V discharge state, 3.0 V charge state.

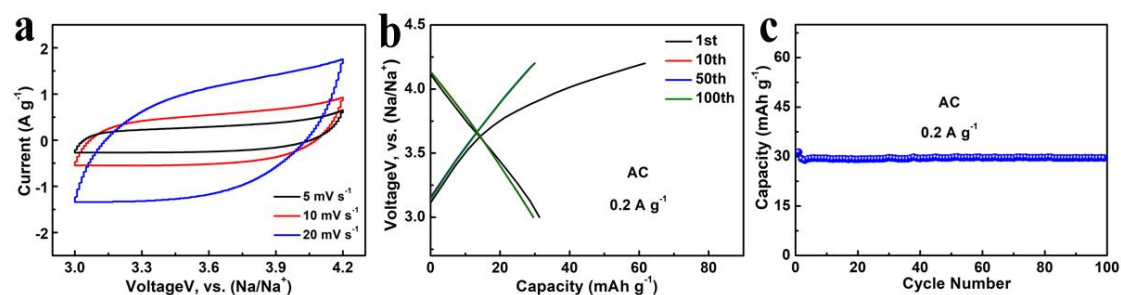

Fig. S8 (a) The CV Curves of AC at different scan rates between 3.0-4.2V. (b) The charge-discharge curves of AC at  $0.2 \text{ A g}^{-1}$  between 3.0-4.2V. (c) The cycling performance of AC at  $0.2 \text{ A g}^{-1}$  between 3.0-4.2V.
